# Supplementary material
Source: publisher site journal article supplement (https://www.spandidos-publications.com/2118/downloadSupplementary)

Figure S1. HSP47 expression level between normal tissues, colon cancer tissues and rectal cancer tissues. A total of 175 surgical samples were analyzed, comprising 36 normal samples, 96 colon cancer samples and 43 rectal cancer samples. Examination of HSP47 expression level in colon and rectum cancer revealed no significant differences. HSP47, heat shock protein 47.

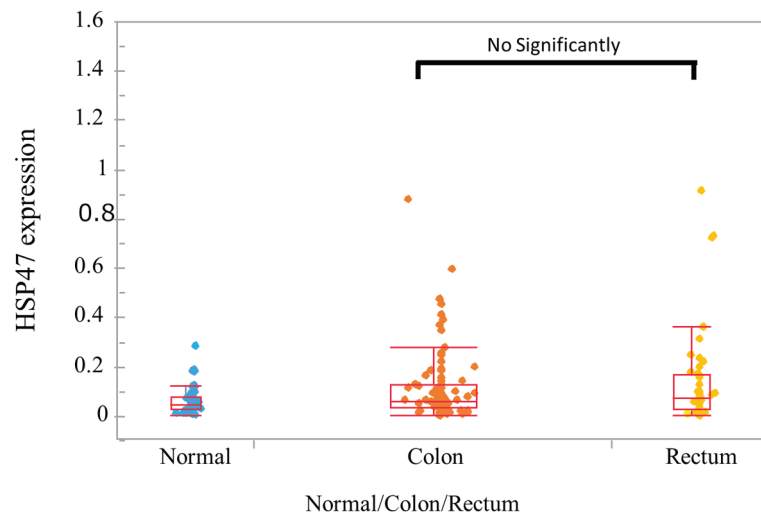

Supplement: Supplementary file 1 [file downloadSupplementary]
